# Supplementary material for: The Complete Mitochondrial DNA of Trypanosoma cruzi: Maxicircles and Minicircles
Source: PubMed Central journal article supplement (PMC8277381; doi:10.3389/fcimb.2021.672448), 2021-06-29

**Supplementary Figure S1.** Multiple whole maxicircle syntenicity maps confirming the high conservation of the coding sequence between different *T. cruzi* strains: Dm28c, TCC (Gerasimov et al., 2020), Y and Bug2148.

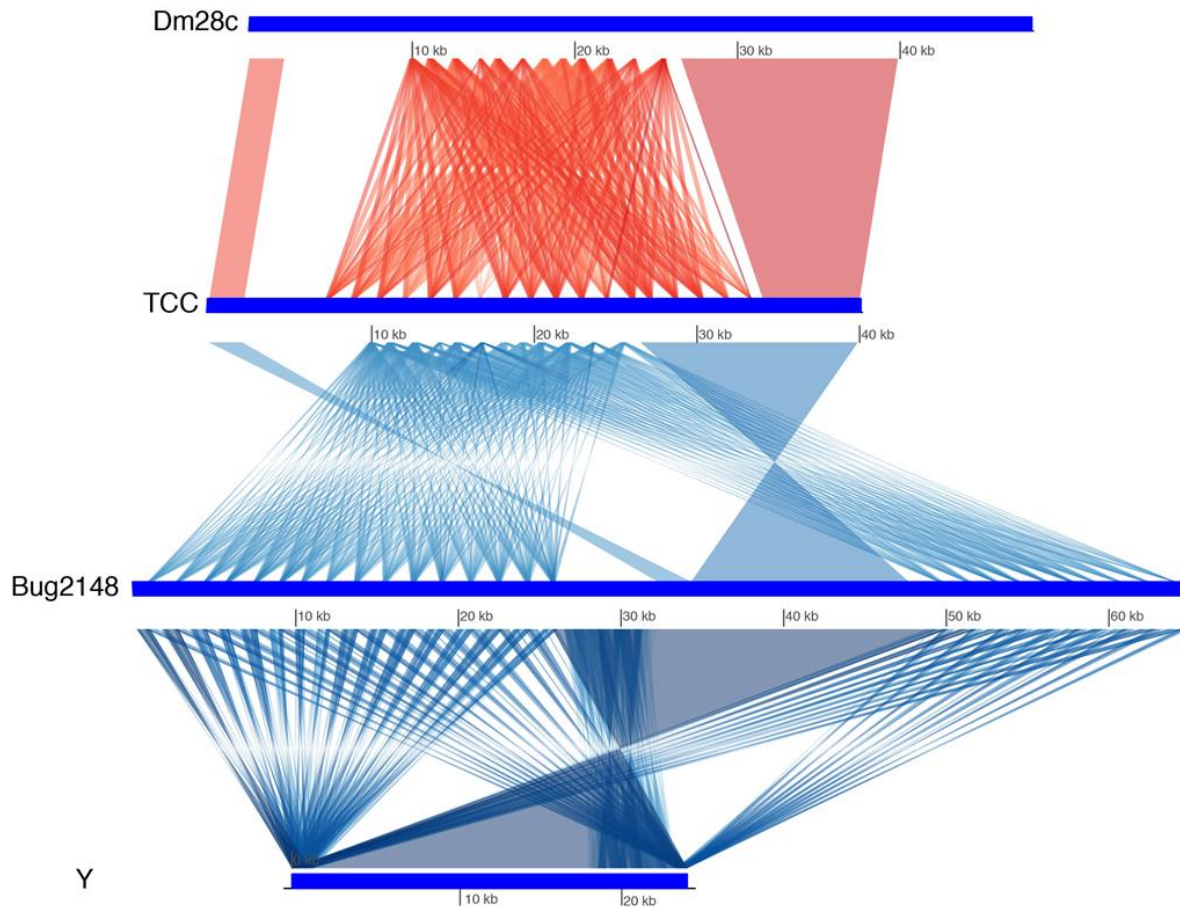

Supplement: Presentation_1.pdf [file Presentation_1.pdf]
