# Supplementary material for: The Complete Mitochondrial DNA of Trypanosoma cruzi: Maxicircles and Minicircles
Source: PubMed Central journal article supplement (PMC8277381; doi:10.3389/fcimb.2021.672448), 2021-06-29
Supplement: Presentation_2.pdf [file Presentation_2.pdf]

# Tc\_minicircle\_Y\_4.128

```
1      10      20      30      40      50      60      70      80      90      100     110     120     130
|-----|-----|-----|-----|-----|-----|-----|-----|-----|-----|-----|-----|
AAATATATGTCGGGGGAGTGCATGAATTTCCGGCCCAAAATCTGAACGCCCTCCCAAACCAACTTCCACGAAATTCCAAACCCAAATTTTATCACAAGCATGCCTACCATATCACTAACCCGT
.....
131    140    150    160    170    180    190    200    210    220    230    240    250    260
|-----|-----|-----|-----|-----|-----|-----|-----|-----|-----|-----|-----|
TAACATATTTTGAACATCATATAGAAATACATAACAACTACACCAACATATGCTCACTATCTCTCCACCACACACACAACTACTCACAACCAACATAACAACTAACATACATACTA
.....
261    270    280    290    300    310    320    330    340    350    360    370    380    390
|-----|-----|-----|-----|-----|-----|-----|-----|-----|-----|-----|-----|
TACCCAATTAATCAGTATACACTACCTACCGCCATCCCTATATTACCCAAACCCAAATCGAACCCCACTCCCGTGACACCCCAAAATCCCAAATATATGACGGGGAGTGCATGAATTT
.....
391    400    410    420    430    440    450    460    470    480    490    500    510    520
|-----|-----|-----|-----|-----|-----|-----|-----|-----|-----|-----|-----|
CGGCCCAAAATCTGAACGCCCTCCCAAATCAAAATTTCCCGTAAATTTTATACCTCCATATCAACCAAGTACAGTATACCACTACCAATACCTAAACCAACTTAACCAAAATATACAA
.....
521    530    540    550    560    570    580    590    600    610    620    630    640    650
|-----|-----|-----|-----|-----|-----|-----|-----|-----|-----|-----|-----|
ATAATAAACAGTATACATCTACTATACAAACCAATCAACATTACTCAGCACAAATCTATTATACACGTTCTCTACCACATACAAACCAATCAACCAATCTATACAAACAGAAACCATATCT
.....
651    660    670    680    690    700    710    720    730    740    750    760    770    780
|-----|-----|-----|-----|-----|-----|-----|-----|-----|-----|-----|-----|
GTCTATATTACACCAACCCCAATCGAACCCCACTCCCGTTAAATCCACAAATCAACGAAATATGTACGGGTGAGATGCATGAATTTCCGGCCCAAAATCTGAACGCCCTCCCAAACCGAATTT
.....
781    790    800    810    820    830    840    850    860    870    880    890    900    910
|-----|-----|-----|-----|-----|-----|-----|-----|-----|-----|-----|-----|
TCCGAATTTTAAACCCATTTCTTATGGAACCAACACACAGCACACCTACCAACCATTAATATTCATACATACATACTAAGTACATAGTACATTAACTTATTAACCTGACCACTACAC
.....
911    920    930    940    950    960    970    980    990    1000   1010   1020   1030   1040
|-----|-----|-----|-----|-----|-----|-----|-----|-----|-----|-----|-----|
TTTACACATCTCAATCTCTACGACTACACACATCAATCTAATCTCAGACAACAATACTATTCAACAATACAAATCAAAACATTATCCACACTATGTATATATTACCAACCCCAATCGAA
.....
1041   1050   1060   1070   1080   1090   1100   1110   1120   1130   1140   1150   1160   1170
|-----|-----|-----|-----|-----|-----|-----|-----|-----|-----|-----|-----|
CCCCACCTCCCGTGACACCCCAATTTTCCGAATTAATGACGGGGGAGTGCATGAATTTCCGGCCCAAAATCTGAACGCCCTCCCAAACCAACTTCCACCAATCTCCGTAGCCTATCTTAT
.....
1171   1180   1190   1200   1210   1220   1230   1240   1250   1260   1270   1280   1290   1300
|-----|-----|-----|-----|-----|-----|-----|-----|-----|-----|-----|-----|
CAGTTCAAACCACTCCAAACATACAAATATATATATCAATTAATACACTACATATTTGATACAACTCTTACAACTACATCTCAAACCTAGTTCCTCCGTACATATCACACTAT
.....
1301   1310   1320   1330   1340   1350   1360   1370   1380   1390   1400   1410   1420
|-----|-----|-----|-----|-----|-----|-----|-----|-----|-----|-----|-----|
ACATCTTAACCTAACCAATACAAATCTACTTTCAATTCATAAACCATACCTCAGCACACTATATTACCAACCCCAATCGAACCCCACTCCCGTGACACCCCAATTAATCAAC
.....
```

# Tc\_minicircle\_Y\_4.12

```
1      10     20     30     40     50     60     70     80     90     100    110    120    130
|-----|-----|-----|-----|-----|-----|-----|-----|-----|-----|-----|-----|
AAATATGTACGGGGGAGATGCATGAAATCCGACCCAAAGTTGARCGCCCTCCCAAAACCCAGATTCCGGATTACCGCACACATTTTCAGGATATTTAGAAACAAAGAACTACTGTCTCAA

.....

131    140    150    160    170    180    190    200    210    220    230    240    250    260
|-----|-----|-----|-----|-----|-----|-----|-----|-----|-----|-----|-----|
AATCATATCAAAATCATATCTATTACACACCCTTATCGCTTARCCATGAATCTAARCATCAAAATACAAATACAAATATTCARCCTAARCTCACTCCATCTGTARCCATACCAAACTATCA

.....

261    270    280    290    300    310    320    330    340    350    360    370    380    390
|-----|-----|-----|-----|-----|-----|-----|-----|-----|-----|-----|-----|
CATACTAATCACACTGTGCTACCATATCCACACCATCAATCAGATGCTATATTACACCAACCCCAATCGAACCCCACTCCCGAAATTCAGCAATTCGCAAAATATGTACGGGGGAGATG

.....

391    400    410    420    430    440    450    460    470    480    490    500    510    520
|-----|-----|-----|-----|-----|-----|-----|-----|-----|-----|-----|-----|
CATGATTTCCGGTCCCAAAATTTGARCGCCCTCCCAAAATCAGTTTTCAGTTTTCAGACCCCAAAATTTACTGCARCCCACTAACAAACACCCATTAACTTACACACATTAATACAAATCAAT

.....

521    530    540    550    560    570    580    590    600    610    620    630    640    650
|-----|-----|-----|-----|-----|-----|-----|-----|-----|-----|-----|-----|
AATAGACTACCATTTACATTTAARCAACCAAACTCTCAACCTTATATTTCTGTGGTAACATATATCACTATATCAATAGTCARCCAAATAAARACATACCGATTAAATATTACTA
AATAAARACATACCGATTAAATATTACTA
AATAAARACATACCGATTAAATATTACTA

.....

651    660    670    680    690    700    710    720    730    740    750    760    770    780
|-----|-----|-----|-----|-----|-----|-----|-----|-----|-----|-----|-----|
CCTCAACCCCGCTATATTACACCAACCCCAATCGARCCCACTCCCGCAAAATCCCAAAATGACCGAAATATGTACGGGGGAGATGCATGAAATCTGGCCCCAAATTTGARCGCCCTCCCA
CCTCAACCCCGCTATATTACACCAACCCCAATCGARCCCACTCCCGCAAAATCCCAAAATGACCGAAATATGTACGGGGGAGATGCATGAAATCTGGCCCCAAATTTGARCGCCCTCCCA
CCTCAACCCCGCTATATTACACCAACCCCAATCGARCCCACTCCCGCAAAATCCCAAAATGACCGAAATATGTACGGGGGAGATGCATGAAATCTGGCCCCAAATTTGARCGCCCTCCCA

.....

781    790    800    810    820    830    840    850    860    870    880    890    900    910
|-----|-----|-----|-----|-----|-----|-----|-----|-----|-----|-----|-----|
AACCAACTTCCACGATTTCCGTARCCATAAATGATGAATATGTTCTAATACACAAACAGAAATAACTGATACACAAATCTATCACATATCTACTGACACCTTAGACAAATATCGACACTACA
AACCAACTTCCACGATTTCCGTARCCATAAATGATGAATATGTTCTAATACACAAACAGAAATAACTGATACACAAATCTATCACATATCTACTGACACCTTAGACAAATATC
AACCAACTTCCACGATTTCCGTARCCATAAATGATGAATATGTTCTAATACACAAACAGAAATAACTGATACACAAATCTATCACATATCTACTGACACCTTAGACAAATATC.....

911    920    930    940    950    960    970    980    990    1000   1010   1020   1030   1040
|-----|-----|-----|-----|-----|-----|-----|-----|-----|-----|-----|-----|
GTCACATACCTCACTAACATATACAGTTAAGTAAACATCACACTATACATAAACACCCCACTAACACAAACCACTAACCACTGACACCTAACATATTTGACCCACAGCTTATATTACACCAAC

.....

1041   1050   1060   1070   1080   1090   1100   1110   1120   1130   1140   1150   1160   1170
|-----|-----|-----|-----|-----|-----|-----|-----|-----|-----|-----|-----|
CCCAATCGARCCCACTCCCGTGACACCCCGGATTTGGCAAAATATGTACGGGGGAGATGCATGAAATTTCCGGTCCCAAAATTTGARCGCCCTCCCAAAACCGAACTCCACGAAATTTTARCC

.....

1171   1180   1190   1200   1210   1220   1230   1240   1250   1260   1270   1280   1290   1300
|-----|-----|-----|-----|-----|-----|-----|-----|-----|-----|-----|-----|
CGCATCTTACCATATCAACCTAAATCAAAACCACTACTTTCATAATATTAAACATATAACATATACCCCAATAAACACAGTCTCACTTCCAACTAACTTTTCTATCACCATGTTCTGTATTA

.....

1301   1310   1320   1330   1340   1350   1360   1370   1380   1390   1400   1410   1420   1430
|-----|-----|-----|-----|-----|-----|-----|-----|-----|-----|-----|-----|
ACTATCATATAAATTCACAGATACAAATTAATCAACTGTCTATACCTATATCTATCCAACTACCCGCAACCAAGCCCTATATTACACCAACCCCAATCGARCCCACTCCCGAAATCCCGC

.....

1431   1440
|-----|
AAATCCAGTA

.....
```

# Tc\_minicircle\_Y\_4.42

```
1      10      20      30      40      50      60      70      80      90      100     110     120     130
|-----|-----|-----|-----|-----|-----|-----|-----|-----|-----|-----|-----|
ATCTTGTTTTGGGAGGGGCGTTCAAAATTTGGGGCCGGAAATTCATGCATCTCCCCCGTACATTATTTGGTCCGAATCCTGAATTTTACGGGGAGGTGGGTTGATTGGGGTTGGTGTATATAGGCAG

.....

131    140    150    160    170    180    190    200    210    220    230    240    250    260
|-----|-----|-----|-----|-----|-----|-----|-----|-----|-----|-----|-----|
TGGGTGTCGGTGTATAGCATTGTGATTGTATGTTATGATGATTAGGTTTGTGATGTTGGTATAGTACATTGAAGTGTGATGAGTATACATCGAGGTGAGGGTATAGAGTGTAGTAGTATGTTCT

.....

261    270    280    290    300    310    320    330    340    350    360    370    380    390
|-----|-----|-----|-----|-----|-----|-----|-----|-----|-----|-----|-----|
AGTTGAGATATACATTTATTTATGATTATATATTTGTTATAAATTTGCTGGTAAATGGTTGCATTGGTAAATGGTGGTTCAGAAATTTGGAAATTTGGTTTGGGAGGGGCGTTCAAAATTTGGG

.....

391    400    410    420    430    440    450    460    470    480    490    500    510    520
|-----|-----|-----|-----|-----|-----|-----|-----|-----|-----|-----|-----|
GCCGAAATTCATGCATCTCCCCCGTACATTATTTGCTGAAATTTGGGGTGTACGGGGAGGTGGGTTGATTGGGGTGGTGTATATAGCATCTGGTTGTTGGAGGGGTTGGTTAGGATATGCG

.....

521    530    540    550    560    570    580    590    600    610    620    630    640    650
|-----|-----|-----|-----|-----|-----|-----|-----|-----|-----|-----|-----|
TATAGAGGGTGTAGTATAGTATTAAAGATGTTGGTTATCGTAGTTGATATGTTGATTAATTTGTTGTGACAGATGAGTGGTGGTTTATGTTGTACTTAGTGAAATGTTATTTATGTTTTGTTT
TATTTATGTTTTGTTT
TATTTATGTTTTGTTT
TATTTATGTTTTGTTT

.....

651    660    670    680    690    700    710    720    730    740    750    760    770    780
|-----|-----|-----|-----|-----|-----|-----|-----|-----|-----|-----|-----|
GATGACTAGATAGATTTATATTAATGATAGGTTGTAGTAGGCTGGAAAAGTGGGAACCTGGTTTTGGGAGGGGCGTCAACTTTGGGGCCAAATTCATGCATCTCCCCCGTACATTATTT
GATGACTAGATAGATTTATATTAATGATAGGTTGTAGTAGGCTGGAAAAGTGGGAACCTGGTTTTGG
GATGACTAGATAGATTTATATTAATGATAGGTTGTAGTAGGCTGGAAAAGTGGGAACCTGGTTTTGG.....

.....

781    790    800    810    820    830    840    850    860    870    880    890    900    910
|-----|-----|-----|-----|-----|-----|-----|-----|-----|-----|-----|-----|
ATCGAATTTGCGATTTTACGGGGAGGTGGGTTGATTGGGGTTGGTGAATATAGGTTTGGATGGTAGAATGGATGGTGGTATTATGAGTTGAGTTGTGTATAGTTCAGTTTGTATAGAT

.....

911    920    930    940    950    960    970    980    990    1000   1010   1020   1030   1040
|-----|-----|-----|-----|-----|-----|-----|-----|-----|-----|-----|-----|
AGTTTGTGATTGTTATGATAGAGCTAGTACCCAAAGTGTATAGTGTGTTAGAGGTAAGAGAGTGAATTTGTTGGATATGATTGAGATGTTGTATAGATCTTAATTTGTATAGTGTGTTGAGGT

.....

1041   1050   1060   1070   1080   1090   1100   1110   1120   1130   1140   1150   1160   1170
|-----|-----|-----|-----|-----|-----|-----|-----|-----|-----|-----|-----|
TGGAAATTAATTTGGGGTTAGAAAATAGCGTAAAGTTGGTTTGGGAGGGGCGTCAACTTTGGGGCCAAATTCATGCATCTCCCCCGTACATTATTTGGCGATTTTGGCATTTTATGGTGAGG

.....

1171   1180   1190   1200   1210   1220   1230   1240   1250   1260   1270   1280   1290   1300
|-----|-----|-----|-----|-----|-----|-----|-----|-----|-----|-----|-----|
TGGGGTTCGATTGGGGTTGGTGAATATAACCAAGATGATTATAGTGGTTAGTATAGATTTATTTATTTATGTTTGTATGATGATTGACCCGATGAGAGTTATAGTGTAGTGTAGATAGT

.....

1301   1310   1320   1330   1340   1350   1360   1370   1380   1390   1400   1410   1420   1430
|-----|-----|-----|-----|-----|-----|-----|-----|-----|-----|-----|-----|
AAGATTTGTTGGTGAAGTTTGTATGAAATCTGTCGTATGTTATATATATGTTAGGGTCAATGTTGGTGTGTGAGTTAGGGTGTGGTGGTGCATTATGGTAGAATGGGTTATGAAATTTGGG
```

1431  
|-1  
AAA  
...

# Tc\_minicircle\_Y\_4.114

```
1      10     20     30     40     50     60     70     80     90     100    110    120    130
|-----|-----|-----|-----|-----|-----|-----|-----|-----|-----|-----|-----|
ATCGGCAAAATATATGACGGGGAGATGCATGAATCTG6CCCTGAAAGTTGAAACGCCCTCCCAAACCAAGAAATTTGCTGAATTTCTGAACCATATCTTARCCCAAAACCATACCCACCCACCCAA

.....

131    140    150    160    170    180    190    200    210    220    230    240    250    260
|-----|-----|-----|-----|-----|-----|-----|-----|-----|-----|-----|-----|
CCARCCATTAAACAAGTATACCGATATAGCATTAACATATTATACACTAAACAACCAATTAACAACTACTCAACTCACTAACAAACGTACCTTATTCATTCACATAGCAGTACATCACTATACAT

.....

261    270    280    290    300    310    320    330    340    350    360    370    380    390
|-----|-----|-----|-----|-----|-----|-----|-----|-----|-----|-----|-----|
ATACAACATATATAGTAAATAAATCTTTATACCTCCATCTTATATTACCAACCCCAATCGAACCCACCTCCCGACAAATCGCAAAATCGGCAAAATATGACGGGGAGATGCATGAAT

.....

391    400    410    420    430    440    450    460    470    480    490    500    510    520
|-----|-----|-----|-----|-----|-----|-----|-----|-----|-----|-----|-----|
TCTGGCCCTGAAAGTTGAAACGCCCTCCCAAACCAAGAAATTCGGGAATTTTACAACCCATTCACTTACATACCATACCCCAACACAACTAACACCAACCAACAAATATACATAGAGCTATACAA

.....

521    530    540    550    560    570    580    590    600    610    620    630    640    650
|-----|-----|-----|-----|-----|-----|-----|-----|-----|-----|-----|-----|
TTATCAACTACTACTACACAAATCAACTCTAATCATTTTACCAACTCATTACATACACACAACTTCTCTAATCCAACTCAACATACAAATACATAGATACATTTTACCTTACCC
ATACATAGATACATTTTACCTTACCC
ATACATAGATACATTTTACCTTACCC

.....

651    660    670    680    690    700    710    720    730    740    750    760    770    780
|-----|-----|-----|-----|-----|-----|-----|-----|-----|-----|-----|-----|
ATGCCAATCCCTATATTACCAACCCCAATCGAACCCACCTCCGGGTGACACCCCAATTTGCCAAATATGACGGGGAGATGCATGAATTTCCGGTCCAAATTTGACGCCCCCTCCAAA
ATGCCAATCCCTATATTACCAACCCCAATCGAACCCACCTCCGGGTGACACCCCAATTTGCCAAATATGACGGGGAGATGCATGAATTTCCGGTCCAAATTTGACGCCCCCTCCAAA
ATGCCAATCCCTATATTACCAACCCCAATCGAACCCACCTCCGGGTGACACCCCAATTTGCCAAATATGACGGGGAGATGCATGAATTTCCGGTCCAAATTTGACGCCCCCTCCAAA

.....

781    790    800    810    820    830    840    850    860    870    880    890    900    910
|-----|-----|-----|-----|-----|-----|-----|-----|-----|-----|-----|-----|
CATATTTTCTGAATTTCTTACCTCCAAATACACAAATATATTATACAAATACCTTCCATTACCTACCAACAACTAACCTTATCTACCAAGCATAAACATTTATACAAATACAGCTAACTAA
CATATTTTCTGAATTTCTTACCTCCAAATACACAAATATATTATACAAATACCTTCCATTACCTACCAACAACTAACCTTATCT
CATATTTTCTGAATTTCTTACCTCCAAATACACAAATATATTATACAAATACCTTCCATTACCTACCAACAACTAACCTTATCT

.....

911    920    930    940    950    960    970    980    990    1000  1010  1020  1030  1040
|-----|-----|-----|-----|-----|-----|-----|-----|-----|-----|-----|-----|
TACAAGACACTAACAACTATCTTCTCAACTTCTATTCCTTCTGTTGTCCTCATACACATCATAAACATATCTATCACTATACAACTGTAATCCACCCTCCTATATTACCAACCCCA

.....

1041  1050  1060  1070  1080  1090  1100  1110  1120  1130  1140  1150  1160  1170
|-----|-----|-----|-----|-----|-----|-----|-----|-----|-----|-----|-----|
TCGAACCCCACTCCCGTGACAAACCCCAATTTACCGAAATATGACGGGGAGATGCATGAATTTCCGGTCCAAATTTGACGCCCCCTCCAAATAGATTTTCTAATTTTCTGAATCAAT

.....

1171  1180  1190  1200  1210  1220  1230  1240  1250  1260  1270  1280  1290  1300
|-----|-----|-----|-----|-----|-----|-----|-----|-----|-----|-----|-----|
TTATCACAGTAAACATATTACCTCAACACAGACTACCAACCCCAACAAATATTTATAAATCAAAATATATTCTATAACACTTCAACTATACAGAACTACACATACTACAAACCA

.....

1301  1310  1320  1330  1340  1350  1360  1370  1380  1390  1400  1410  1420  1430
|-----|-----|-----|-----|-----|-----|-----|-----|-----|-----|-----|-----|
TAATGTTTGTGCAGTCACTACTCAAGTACACACACCTCATTACTATACATACGACATTAATGTACCTTCAGCTCCATGCTATATTACCAACCCCAATCGAACCCACCTCCCTGACAAATCACA
```

143331  
||  
AA  
..

# Tc\_minicircle\_Y\_4.115

```
1      10     20     30     40     50     60     70     80     90     100    110    120    130
|-----|-----|-----|-----|-----|-----|-----|-----|-----|-----|-----|-----|
| AATGTACGGGGAGATGCATGAATTTCCGGTCCAAATTTGACGCCCCCTCCCAAACCGAGGAATCTGCGTAAATTCGTAACTATARTCTACCAATATCAACCCATACACACCCCTCATTCAAACAT
|-----|-----|-----|-----|-----|-----|-----|-----|-----|-----|-----|-----|-----|
131    140    150    160    170    180    190    200    210    220    230    240    250    260
|-----|-----|-----|-----|-----|-----|-----|-----|-----|-----|-----|-----|-----|
| TATACTTACAAACCAATACCAACTAATACACGTCAAATTTATCTTACACACTCATTATATCTTCTTGTGCAACTCATATTACATCATGATCAGTACAAACATATACATATAGCTCT
|-----|-----|-----|-----|-----|-----|-----|-----|-----|-----|-----|-----|-----|
261    270    280    290    300    310    320    330    340    350    360    370    380    390
|-----|-----|-----|-----|-----|-----|-----|-----|-----|-----|-----|-----|-----|
| CACTAAATATTATCCATACCCACTGATGCTATATTACACACCCCAATCGAACCCCACTCCCGACAAATGCAAAATCAGCAAATATGTACGGGGAGATGCATGAATTTCCGGCTGAAAG
|-----|-----|-----|-----|-----|-----|-----|-----|-----|-----|-----|-----|-----|
391    400    410    420    430    440    450    460    470    480    490    500    510    520
|-----|-----|-----|-----|-----|-----|-----|-----|-----|-----|-----|-----|-----|
| TTGACGCCCTCCCAAACCGAGTTCCACCAATTTCCGTCCAAATTTATACCAACCAACACACACCCCACTCCCAATATACCCCTACTACACCTCCAGATATAAATTTATATACATATATC
|-----|-----|-----|-----|-----|-----|-----|-----|-----|-----|-----|-----|-----|
521    530    540    550    560    570    580    590    600    610    620    630    640    650
|-----|-----|-----|-----|-----|-----|-----|-----|-----|-----|-----|-----|-----|
| AATTCATATCAATCAACATACCAATACCTCTGCACTACTACTATACCTCACAATGAATTCACCTGCTACATATATCAACCAATTCACCTACCTACTAATCTTATACCACTCCACACACATC
|-----|-----|-----|-----|-----|-----|-----|-----|-----|-----|-----|-----|-----|
651    660    670    680    690    700    710    720    730    740    750    760    770    780
|-----|-----|-----|-----|-----|-----|-----|-----|-----|-----|-----|-----|-----|
| CCTATATTACATCAACCCCAATCGAACCCCACTCCCGTGACACCCCAATTTTCAGCCAATATGTACGGGGAGATGCATGAATTTCCGGTCCAAATTTGACGCCCCCTCCCAAACCGAGATTT
|-----|-----|-----|-----|-----|-----|-----|-----|-----|-----|-----|-----|-----|
680    690    700    710    720    730    740    750    760    770    780
|-----|-----|-----|-----|-----|-----|-----|-----|-----|-----|-----|-----|-----|
| CCTATATTACATCAACCCCAATCGAACCCCACTCCCGTGACACCCCAATTTTCAGCCAATATGTACGGGGAGATGCATGAATTTCCGGTCCAAATTTGACGCCCCCTCCCAAACCGAGATTT
|-----|-----|-----|-----|-----|-----|-----|-----|-----|-----|-----|-----|-----|
781    790    800    810    820    830    840    850    860    870    880    890    900    910
|-----|-----|-----|-----|-----|-----|-----|-----|-----|-----|-----|-----|-----|
| CCGGAAATTCGAACTATCTCTGACCCATACACCCTAACCGTAATTTCTATATACACATACCTATTACTACATACATTACCAACCAACATACTCACACTATCTACTCTCTCAGTGATC
|-----|-----|-----|-----|-----|-----|-----|-----|-----|-----|-----|-----|-----|
911    920    930    940    950    960    970    980    990    1000   1010   1020   1030   1040
|-----|-----|-----|-----|-----|-----|-----|-----|-----|-----|-----|-----|-----|
| CTCTACCAATCAATATACCAACCAATACATACATACATACATACATACATACATACATACATACATACATACATACATACATACATACATACATACATACATACATACATACATACAT
|-----|-----|-----|-----|-----|-----|-----|-----|-----|-----|-----|-----|-----|
1041   1050   1060   1070   1080   1090   1100   1110   1120   1130   1140   1150   1160   1170
|-----|-----|-----|-----|-----|-----|-----|-----|-----|-----|-----|-----|-----|
| ACAAAATGCGAAATCAGCAAATATGTACGGGGAGATGCATGAATTTCCGGCTCCAAATTTGACGCCCCCTCCCAAACCGAGGAATTCGCGTAAATTCGTAACTATARTCTACCAATATCAACCCATACACACCCCTCATTCAAACAT
|-----|-----|-----|-----|-----|-----|-----|-----|-----|-----|-----|-----|-----|
1171   1180   1190   1200   1210   1220   1230   1240   1250   1260   1270   1280   1290   1300
|-----|-----|-----|-----|-----|-----|-----|-----|-----|-----|-----|-----|-----|
| ACCTACCTCAACCAATTCCAAACCAATACACTTACCAATACCAACTATACCAATACACTCAATACTATCAATATTAACACTACACAAGTACCAACCAACTCATAAACTAATCATACCATC
|-----|-----|-----|-----|-----|-----|-----|-----|-----|-----|-----|-----|-----|
1301   1310   1320   1330   1340   1350   1360   1370   1380   1390   1400   1410   1420
|-----|-----|-----|-----|-----|-----|-----|-----|-----|-----|-----|-----|-----|
| TCGACCACTATCATATAACCATACAACTACACGCTATAATAAATCAACCCCTATATTACACCAACCCCAATCGAACCCCACTCCCGTGACACCCCAATTTCCAGCAAT
|-----|-----|-----|-----|-----|-----|-----|-----|-----|-----|-----|-----|-----|
```

# Tc\_minicircle\_Y\_3.4

```
1      10      20      30      40      50      60      70      80      90      100     110     120     130
|-----|-----|-----|-----|-----|-----|-----|-----|-----|-----|-----|-----|
TTGTTGTGTACAGTATATGTATGTTAATGTATGAGGGTACTGGTATAGGTTTGGGTTGTGTATGGGTGTATARTTGAATGTTGGTAGARTGGTTACGAAATTTGTGGAACGTGGTTTGGGAG
.....
131    140    150    160    170    180    190    200    210    220    230    240    250    260
|-----|-----|-----|-----|-----|-----|-----|-----|-----|-----|-----|-----|
GGCGTTCAAAATTTGGGGCCGAAARATCATGCATCTCCCCGTACATTATTTCCGGGATTTATGGAARATTCGGGGAGGTGGGGGTTGATTGGGGTTGGTGTATATAGGCTGGGGTAGATTATGTA
.....
261    270    280    290    300    310    320    330    340    350    360    370    380    390
|-----|-----|-----|-----|-----|-----|-----|-----|-----|-----|-----|-----|
TTAAGACTGAGTAGATGTTGTRAGATTATGTAGTGTGATTTGTGATGTATGCAGAGATAAACACAGGATGGTGAGAGTGATAGTAGTATAGTCTTTGGTCTTTGATAGTAGATAGTATATGTTATA
.....
391    400    410    420    430    440    450    460    470    480    490    500    510    520
|-----|-----|-----|-----|-----|-----|-----|-----|-----|-----|-----|-----|
TTAARATGTTAATAGGTGGGTGCTGTAGTTTGGTATGTTATAGGATCAACATAAATAGTGTCTGAAATTTGCGCGAATCTTTGGTTTTGGGAGGGGCGTTCAAAATTTGGACCGGAAATTCATG
.....
521    530    540    550    560    570    580    590    600    610    620    630    640    650
|-----|-----|-----|-----|-----|-----|-----|-----|-----|-----|-----|-----|
CATCTCCCCGTACATTATTTGCAATTTAGGGGGTTGTCACGGGGAGGTGGGGTTCGATTTGGGGTTGGTGTARTATAGGATACGAGCTATGAGATGTTTGTAGTTGTTAGTTAGTGTATGTTGATGGT
.....
651    660    670    680    690    700    710    720    730    740    750    760    770    780
|-----|-----|-----|-----|-----|-----|-----|-----|-----|-----|-----|-----|
ATTGAGTTTAGGTGAGATTGCGTACATAATAGTTGTATTGGATAGATTTGAGGTTAGTTAAGTATTGAGTTATAGATTTGATTTGTATGTTATGTGTTAGGAGGGGTATGATTTGCGCGTGTG
.....
781    790    800    810    820    830    840    850    860    870    880    890    900    910
|-----|-----|-----|-----|-----|-----|-----|-----|-----|-----|-----|-----|
AGTTGGTTGTGTTATGTTGGTGAATGGAGGTTAAARATTTCTGGAACTGGTTTTGGGAGGGGCGTTCAAAATTTGGACCGGAAATTCATGCATCTCCCCGTACATTATTTGGTCAAAATGGGG
.....
911    920    930    940    950    960    970    980    990    1000   1010   1020   1030   1040
|-----|-----|-----|-----|-----|-----|-----|-----|-----|-----|-----|-----|
GTTGTACGGGGAGGTGGGGTTGATTGGGGTTGGTGTATATAGGATACGAGTTATGATTATGATTATTTAGTTTATGTTGATATTGATGTTTACGTGTAGGCAATGTACATGAGTTTGTGTTGATA
.....
1041  1050  1060  1070 1074
|-----|-----|-----|-----|
CTCGGTGGAATTTGATTTGATTTGATTTGAAT
.....
```



# Tc\_minicircle\_Y\_4.69

1 10 20 30 40 50 60 70 80 90 100 110 120 130  
|-----|-----|-----|-----|-----|-----|-----|-----|-----|-----|-----|-----|-----|-----|  
| GTTCCCGAATTCTAGAGATCCAAATTTAFCATACATCTCATCCACCARACCACAGATATCCACATACCTATACCACCCTAACACTTATAATATAATATCTTARTATACACTAACATCAAT

131 140 150 160 170 180 190 200 210 220 230 240 250 260  
|-----|-----|-----|-----|-----|-----|-----|-----|-----|-----|-----|-----|-----|-----|  
| CAATACACTCTCATCTTTCTCACACTTAGAACTCACACTGCCCTCAACATATCAAACTAATCATCCACTAATAAATCAGAAATCATAACATATAAATGCTATATTACCCARACC

261 270 280 290 300 310 320 330 340 350 360 370 380 390  
|-----|-----|-----|-----|-----|-----|-----|-----|-----|-----|-----|-----|-----|-----|  
| CAATCGARCCCCACTCCCGTGACARCCCTGATTTTGGGGAAATATGTACGGGGAGATGCATGAATTTCCGCCCAAAATTTGACGCCCTCCCAAAACCGAATTTCTGAATTTCCGTAACT

391 400 410 420 430 440 450 460 470 480 490 500 510 520  
|-----|-----|-----|-----|-----|-----|-----|-----|-----|-----|-----|-----|-----|-----|  
| ATTTATACACACATCTCTGTGCACACTACCCCTACCACACCCACTACTACTTCAAAATATATACATTACCAATATCAAACTAATAATACACATATTACAAATCACTACGCACATCAAT

521 530 540 550 560 570 580 590 600 610 620 630 640 650  
|-----|-----|-----|-----|-----|-----|-----|-----|-----|-----|-----|-----|-----|-----|  
| CACTTCTATATGATCTCAACACTATCAAACTAATTCARACAATAACTAARATTAATACTACCAATACACTATATTACACCARCCCAATCGARCCCCACTCCCGTGACARCCCAAAAT  
TCARACAATAACTAARATTAATACTACCAATACACTATATTACACCARCCCAATCGARCCCCACTCCCGTGACARCCCAAAAT  
TCARACAATAACTAARATTAATACTACCAATACACTATATTACACCARCCCAATCGARCCCCACTCCCGTGACARCCCAAAAT

651 660 670 680 690 700 710 720 730 740 750 760 770 780  
|-----|-----|-----|-----|-----|-----|-----|-----|-----|-----|-----|-----|-----|-----|  
| TGGCAATATGTACGGGGAGATGCATGAATTTCCGCCCAAAATCGARCCCCCTCCCAATCCAGGTTTTCTGAATTTCCGTAACTTTTATCCTGGATACACACACATTCARCCAAAC  
TGGCAATATGTACGGGGAGATGCATGAATTTCCGCCCAAAATCGARCCCCCTCCCAATCCAGGTTTTCTGAATTTCCGTAACTTTTATCCTGGATACACACACATTCARCCAAAC  
TGGCAATATGTACGGGGAGATGCATGAATTTCCGCCCAAAATCGARCCCCCTCCCAATCCAGGTTTTCTGAATTTCCGTAACTTTTATCCTGGATACACACACATTCARCCAAAC

781 790 800 810 820 830 840 850 860 870 880 890 900 910  
|-----|-----|-----|-----|-----|-----|-----|-----|-----|-----|-----|-----|-----|-----|  
| CCTACCACCCCAAACTAGTAGCATATAAATAAATAAATCAATAAACATTAGTAGCAAACTTAACTATGTATACCGAACACTATGCAAACTCTACATACCTATACGTTAGACATCACACAT  
CCTACCACCCCAAACTAGTAGCATATAAATAAATAAATCAATAAACATTAGTAGCAAACTTAACTATGTATACCGAACACTATGCAAACT  
CCTACCACCCCAAACTAGTAGCATATAAATAAATAAATCAATAAACATTAGTAGCAAACTTAACTATGTATACCGAACACTATGCAAACT

911 920 930 940 950 960 970 980 990 1000 1010 1020 1030 1040  
|-----|-----|-----|-----|-----|-----|-----|-----|-----|-----|-----|-----|-----|-----|  
| CACATACTCCAAATCAGAAATACCATCTAATCAACCAATCACTACAGTCTATATTACACCARCCCAATCGARCCCCACTCCCGCAAAATCACAATAGCCAAATATGTACGGGTGAGATG

1041 1050 1060 1070 1080 1090 1100 1110 1120 1130 1140 1150 1160 1170  
|-----|-----|-----|-----|-----|-----|-----|-----|-----|-----|-----|-----|-----|-----|  
| CATGAATTCGGCCCTGAAGTTGACGCCCTCCCAAAACAGAGTTCGCCATTTCCGTAGTCAATTTTAACTATGTTATTGTTAARACATACACTAACACACATTAGCAATCAATCACTTAA

1171 1180 1190 1200 1210 1220 1230 1240 1250 1260 1270 1280 1290 1300  
|-----|-----|-----|-----|-----|-----|-----|-----|-----|-----|-----|-----|-----|-----|  
| CACCAAACTCATATTCTACTAGTGTCTATCTCACTTCACTATCTAACAACTCAATCAAGTGTATAAACACCAATAAATACAAACATCTATCAAAATACATACCTTAACTACTTACC

1301 1310 1320 1330 1340 1350 1360 1370 1380 1390 1400 1410 1420 1430  
|-----|-----|-----|-----|-----|-----|-----|-----|-----|-----|-----|-----|-----|-----|  
| AACACAGGTACTATATTACACCARCCCAATCGARCCCCACTCCCGCAAAATTCACCAATTTCCCAAAATATGTACGGGGAGATGCATGAATTTCCGCCCAAAATTTGACGCCCTCCCAAAAC

143#  
|---|  
AGGA  
....
